# Supplementary material
Source: PubMed Central journal article supplement (PMC7718333)
Supplement: NIHMS1625742-supplement-2.pdf [file NIHMS1625742-supplement-2.pdf]

**Western blots**

**a, Extended Data Fig. 1e**

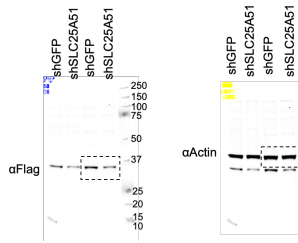

**b, Extended Data Fig. 1h**

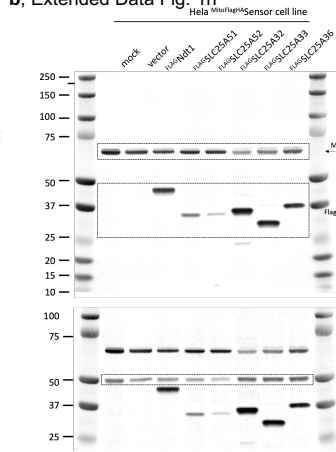

**c, Extended Data Fig. 1p**

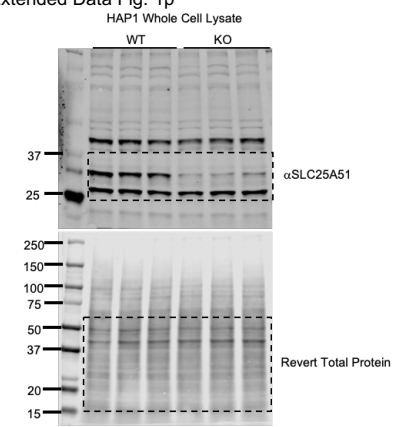

**e, Fig. 2i**

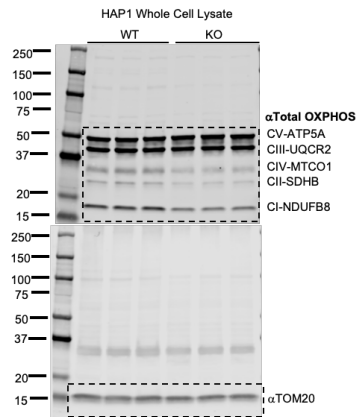

**f, Fig. 3f**

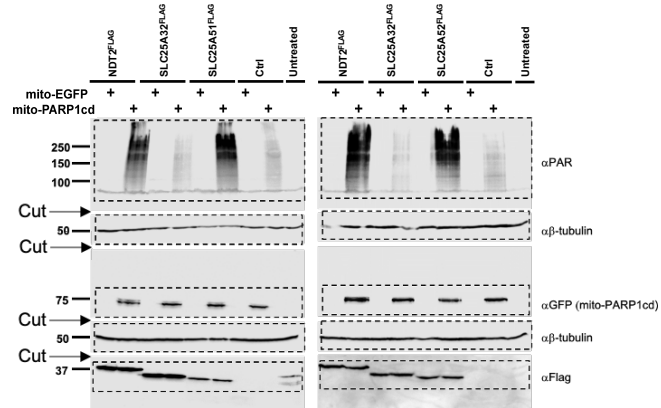

**g, Fig. 3g**

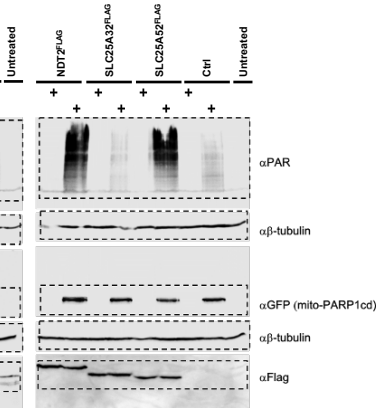

**h, Extended Data Fig. 4d**

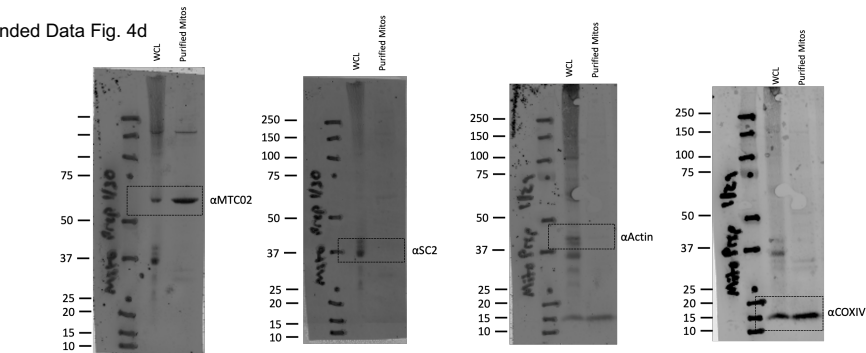

**DNA agrose gels**

**i, Extended Data Fig. 4a**

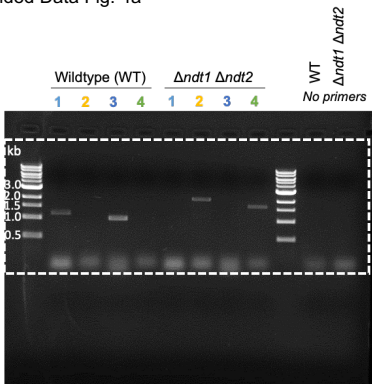

**j, Extended Data Fig. 4e**

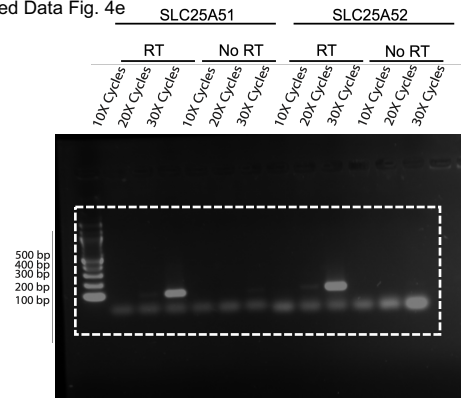

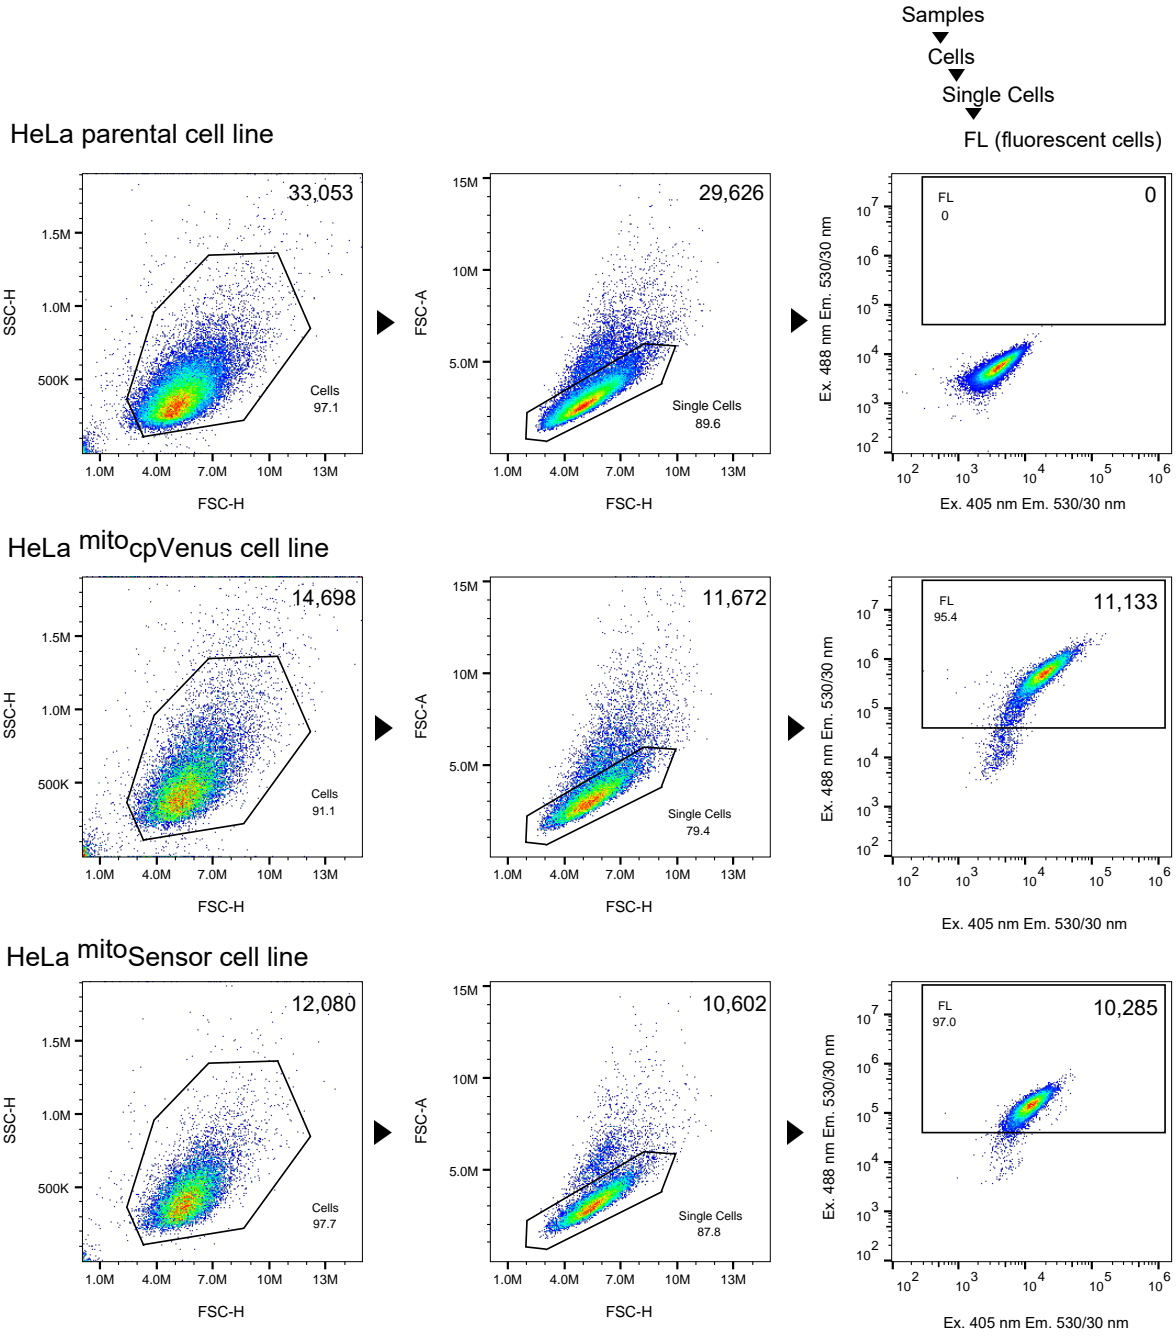

**Supplementary Figure 2. Gating strategy for flow cytometry analysis**
